# Supplementary material for: MicroRNA Predictors of Longevity in Caenorhabditis elegans
Source: PubMed Central journal article supplement (PMC3183074; doi:10.1371/journal.pgen.1002306), 2011-09-29

### Acquire images:

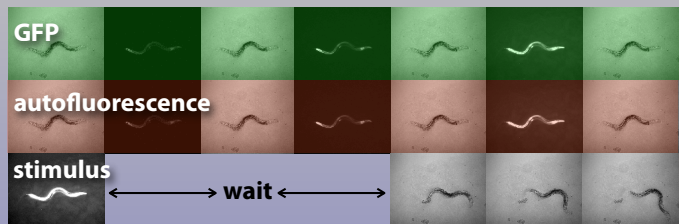

### Is animal alive?

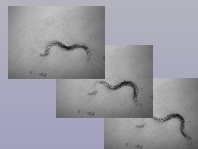

### Choose best image pairs:

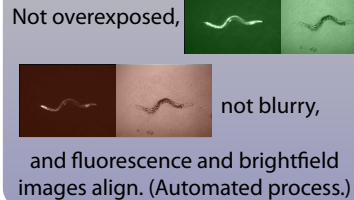

### Make Measurements

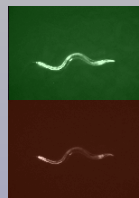

quantitative  
fluorescence  
intensities

morphological parameters (length, &c.)

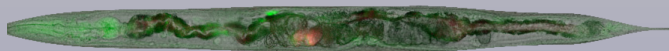

fluorescence localization patterns  
brightfield image texture

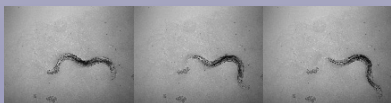

movement rates

### Segment images:

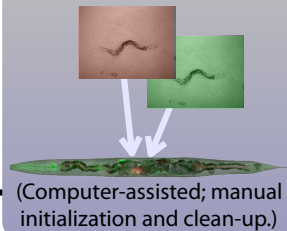

Supplement: pgen.1002306.s001.pdf [file pgen.1002306.s001.pdf]
