# Supplementary material for: MicroRNA Predictors of Longevity in Caenorhabditis elegans
Source: PubMed Central journal article supplement (PMC3183074; doi:10.1371/journal.pgen.1002306), 2011-09-29

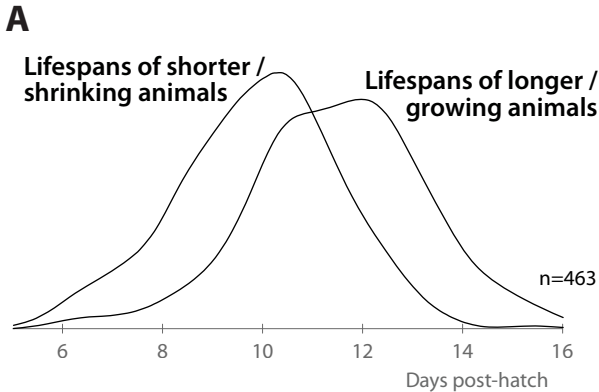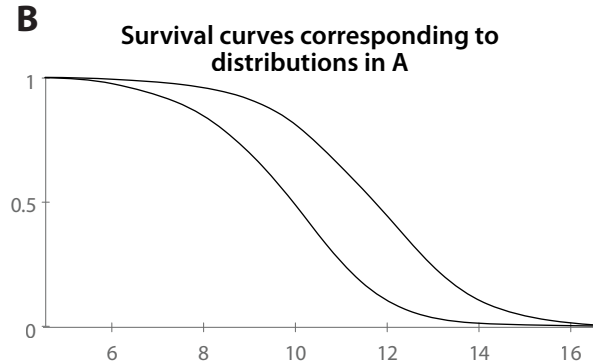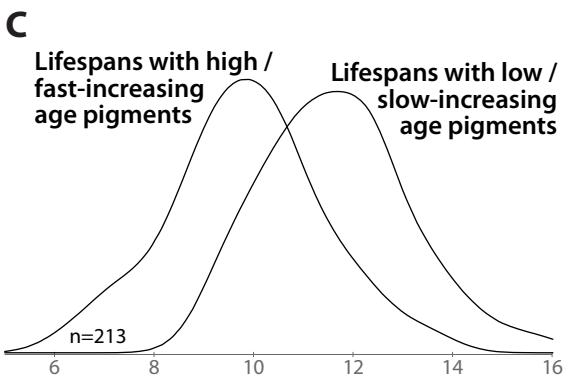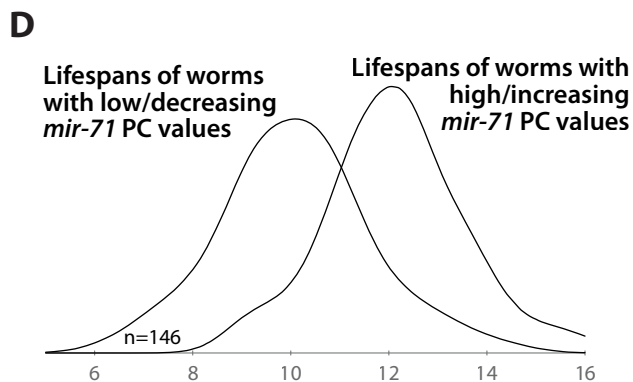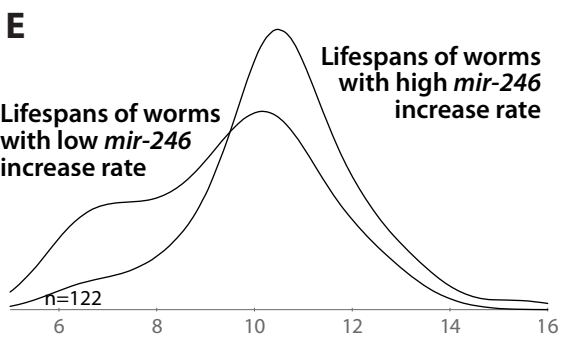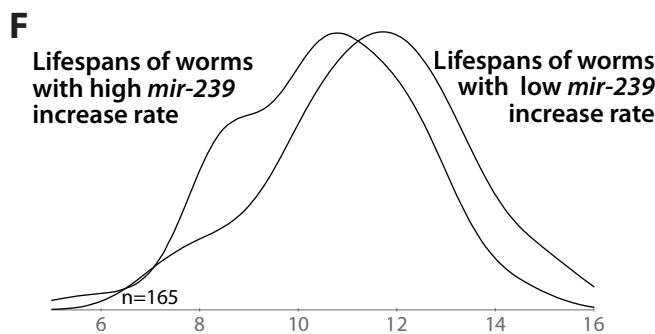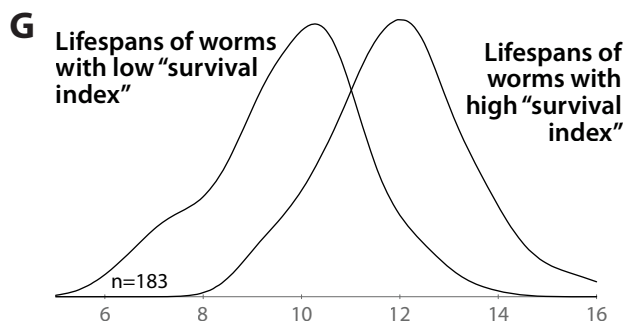

Supplement: pgen.1002306.s002.pdf [file pgen.1002306.s002.pdf]
