# Supplementary material for: MicroRNA Predictors of Longevity in Caenorhabditis elegans
Source: PubMed Central journal article supplement (PMC3183074; doi:10.1371/journal.pgen.1002306), 2011-09-29
Supplement: pgen.1002306.s003.pdf [file pgen.1002306.s003.pdf]

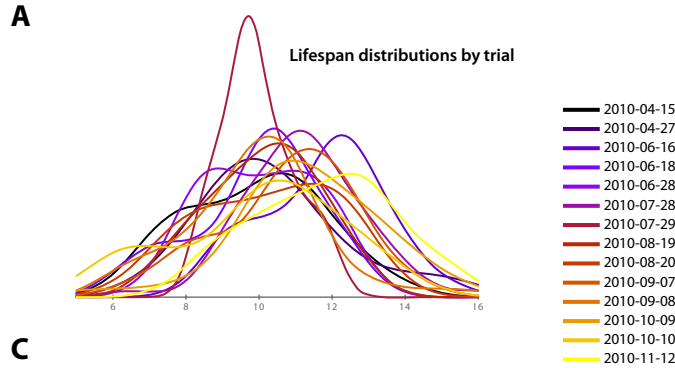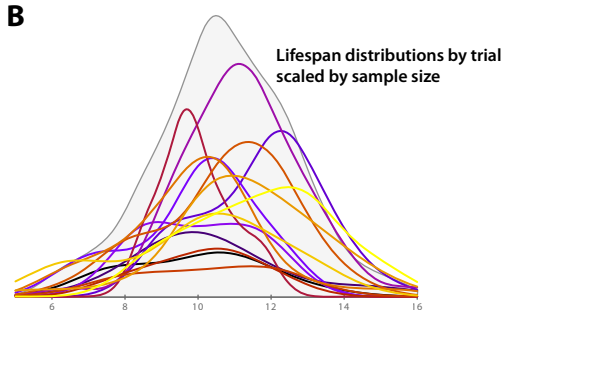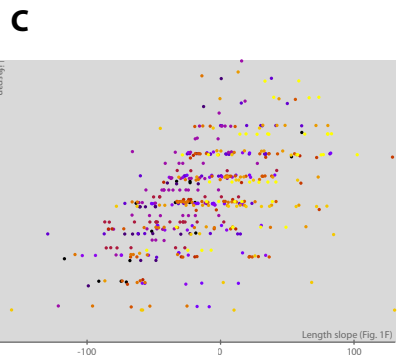

**Length slope**  
 $R^2=0.2730$  ( $r=0.5225$ ;  $p<0.0001$ )  
 2010-04-15 (n=16)  $r=0.8561$  ( $p<0.0001$ )  
 2010-04-27 (n=21)  $r=0.7932$  ( $p<0.0001$ )  
 2010-06-16 (n=46)  $r=0.6324$  ( $p<0.0001$ )  
 2010-06-18 (n=37)  $r=0.3921$  ( $p=0.0164$ )  
 2010-06-28 (n=26)  $r=0.5067$  ( $p=0.0083$ )  
 2010-07-28 (n=63)  $r=0.7301$  ( $p<0.0001$ )  
 2010-07-29 (n=30)  $r=0.6025$  ( $p=0.0004$ )  
 2010-08-19 (n=14)  $r=0.5127$  ( $p=0.0609$ )  
 2010-08-20 (n=12)  $r=0.5756$  ( $p=0.0502$ )  
 2010-09-07 (n=47)  $r=0.5488$  ( $p<0.0001$ )  
 2010-09-08 (n=39)  $r=0.5323$  ( $p<0.0005$ )  
 2010-10-09 (n=40)  $r=0.6662$  ( $p<0.0001$ )  
 2010-10-10 (n=32)  $r=0.1631$  ( $p=0.3724$ )  
 2010-11-12 (n=40)  $r=0.6016$  ( $p<0.0001$ )

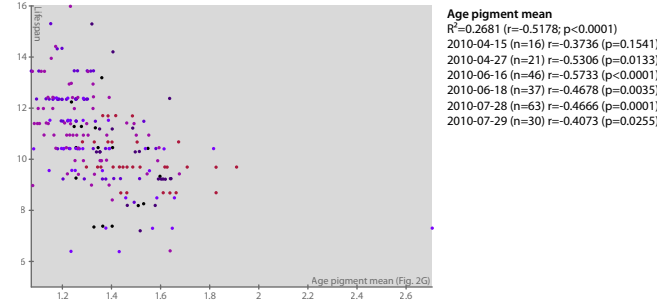

**Age pigment mean**  
 $R^2=0.2681$  ( $r=0.5178$ ;  $p<0.0001$ )  
 2010-04-15 (n=16)  $r=0.3736$  ( $p=0.1541$ )  
 2010-04-27 (n=21)  $r=0.5306$  ( $p=0.0133$ )  
 2010-06-16 (n=46)  $r=0.5733$  ( $p<0.0001$ )  
 2010-06-18 (n=37)  $r=0.4678$  ( $p=0.0035$ )  
 2010-07-28 (n=63)  $r=0.4666$  ( $p=0.0001$ )  
 2010-07-29 (n=30)  $r=0.4073$  ( $p=0.0255$ )

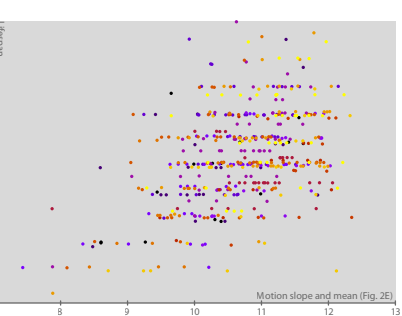

**Motion slope and mean**  
 $R^2=0.2011$  ( $r=0.4488$ ;  $p<0.0001$ )  
 2010-04-15 (n=16)  $r=0.6189$  ( $p=0.0106$ )  
 2010-04-27 (n=21)  $r=0.4663$  ( $p=0.0331$ )  
 2010-06-16 (n=46)  $r=0.2770$  ( $p=0.0624$ )  
 2010-06-18 (n=37)  $r=0.6108$  ( $p<0.0001$ )  
 2010-06-28 (n=26)  $r=0.6834$  ( $p<0.0001$ )  
 2010-07-28 (n=63)  $r=0.5910$  ( $p<0.0001$ )  
 2010-07-29 (n=30)  $r=0.0863$  ( $p=0.6502$ )  
 2010-08-19 (n=14)  $r=0.5649$  ( $p=0.0353$ )  
 2010-08-20 (n=12)  $r=0.3549$  ( $p=0.2576$ )  
 2010-09-07 (n=47)  $r=0.3607$  ( $p=0.0127$ )  
 2010-09-08 (n=39)  $r=0.5327$  ( $p=0.0005$ )  
 2010-10-09 (n=40)  $r=0.5546$  ( $p=0.0002$ )  
 2010-10-10 (n=32)  $r=0.4662$  ( $p=0.0072$ )  
 2010-11-12 (n=40)  $r=0.3257$  ( $p=0.0403$ )

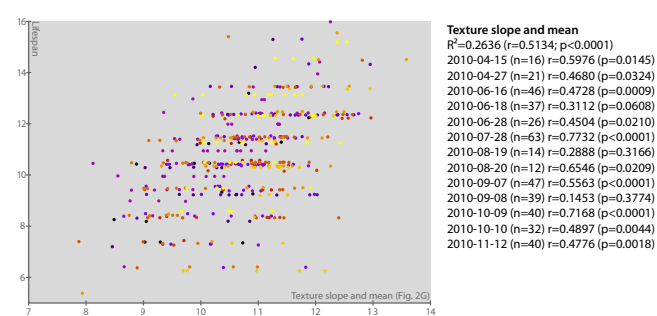

**Texture slope and mean**  
 $R^2=0.2636$  ( $r=0.5134$ ;  $p<0.0001$ )  
 2010-04-15 (n=16)  $r=0.5976$  ( $p=0.0145$ )  
 2010-04-27 (n=21)  $r=0.4680$  ( $p=0.0324$ )  
 2010-06-16 (n=46)  $r=0.4728$  ( $p=0.0009$ )  
 2010-06-18 (n=37)  $r=0.3112$  ( $p=0.0608$ )  
 2010-06-28 (n=26)  $r=0.4504$  ( $p=0.0210$ )  
 2010-07-28 (n=63)  $r=0.7732$  ( $p<0.0001$ )  
 2010-08-19 (n=14)  $r=0.2888$  ( $p=0.3166$ )  
 2010-08-20 (n=12)  $r=0.6546$  ( $p=0.0209$ )  
 2010-09-07 (n=47)  $r=0.5563$  ( $p<0.0001$ )  
 2010-09-08 (n=39)  $r=0.1453$  ( $p=0.3774$ )  
 2010-10-09 (n=40)  $r=0.7168$  ( $p<0.0001$ )  
 2010-10-10 (n=32)  $r=0.4897$  ( $p=0.0044$ )  
 2010-11-12 (n=40)  $r=0.4776$  ( $p=0.0018$ )

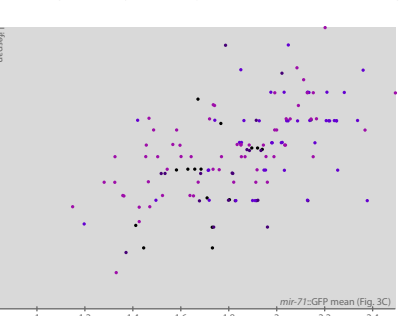

**mir-71::GFP mean**  
 $R^2=0.3199$  ( $r=0.5656$ ;  $p<0.0001$ )  
 2010-04-15 (n=16)  $r=0.5510$  ( $p=0.0270$ )  
 2010-04-27 (n=21)  $r=0.3472$  ( $p=0.1230$ )  
 2010-06-16 (n=46)  $r=0.4296$  ( $p=0.0029$ )  
 2010-07-28 (n=63)  $r=0.6617$  ( $p<0.0001$ )

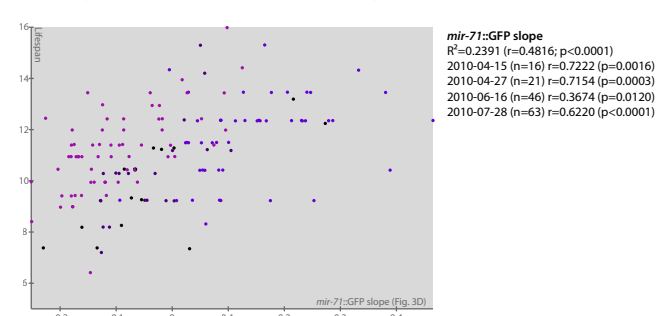

**mir-71::GFP slope**  
 $R^2=0.2391$  ( $r=0.4816$ ;  $p<0.0001$ )  
 2010-04-15 (n=16)  $r=0.7222$  ( $p=0.0016$ )  
 2010-04-27 (n=21)  $r=0.7154$  ( $p=0.0003$ )  
 2010-06-16 (n=46)  $r=0.3674$  ( $p=0.0120$ )  
 2010-07-28 (n=63)  $r=0.6220$  ( $p<0.0001$ )

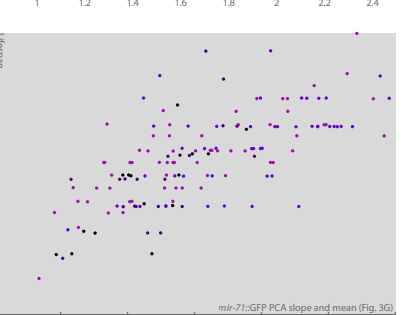

**mir-71::GFP PCA slope and mean**  
 $R^2=0.4746$  ( $r=0.6889$ ;  $p<0.0001$ )  
 2010-04-15 (n=16)  $r=0.7746$  ( $p=0.0004$ )  
 2010-04-27 (n=21)  $r=0.6530$  ( $p=0.0013$ )  
 2010-06-16 (n=46)  $r=0.5234$  ( $p=0.0002$ )  
 2010-07-28 (n=63)  $r=0.7525$  ( $p<0.0001$ )

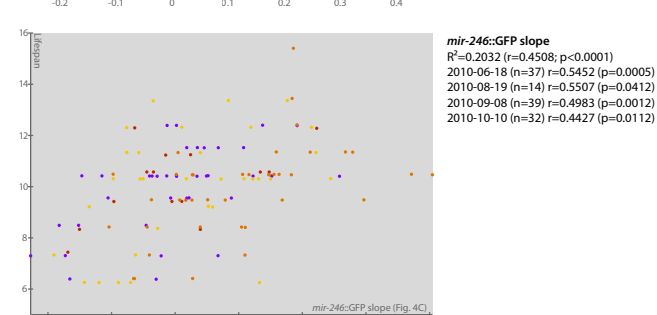

**mir-246::GFP slope**  
 $R^2=0.2032$  ( $r=0.4508$ ;  $p<0.0001$ )  
 2010-06-18 (n=37)  $r=0.5452$  ( $p=0.0005$ )  
 2010-08-19 (n=14)  $r=0.5507$  ( $p=0.0412$ )  
 2010-09-08 (n=39)  $r=0.4983$  ( $p=0.0012$ )  
 2010-10-10 (n=32)  $r=0.4427$  ( $p=0.0112$ )

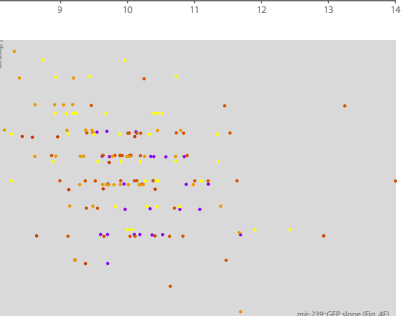

**mir-239::GFP slope**  
 $R^2=0.0976$  ( $r=0.3124$ ;  $p<0.0001$ )  
 2010-06-28 (n=26)  $r=-0.1411$  ( $p=0.4917$ )  
 2010-08-20 (n=12)  $r=-0.4012$  ( $p=0.1961$ )  
 2010-09-07 (n=47)  $r=0.0924$  ( $p=0.5367$ )  
 2010-10-09 (n=40)  $r=-0.6277$  ( $p<0.0001$ )  
 2010-11-12 (n=40)  $r=-0.4429$  ( $p=0.0042$ )

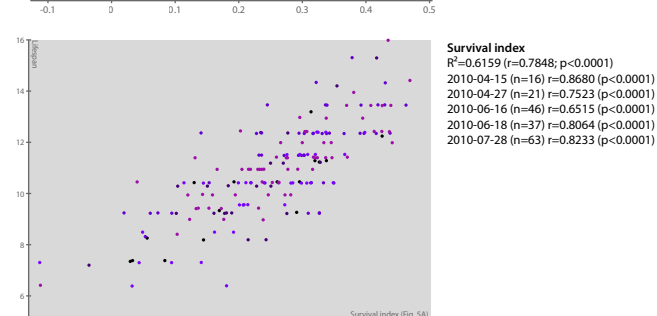

**Survival index**  
 $R^2=0.6159$  ( $r=0.7848$ ;  $p<0.0001$ )  
 2010-04-15 (n=16)  $r=0.8680$  ( $p<0.0001$ )  
 2010-04-27 (n=21)  $r=0.7523$  ( $p<0.0001$ )  
 2010-06-16 (n=46)  $r=0.6515$  ( $p<0.0001$ )  
 2010-06-18 (n=37)  $r=0.8064$  ( $p<0.0001$ )  
 2010-07-28 (n=63)  $r=0.8233$  ( $p<0.0001$ )
