# Supplementary material for: MicroRNA Predictors of Longevity in Caenorhabditis elegans
Source: PubMed Central journal article supplement (PMC3183074; doi:10.1371/journal.pgen.1002306), 2011-09-29

## All Data (n=463)

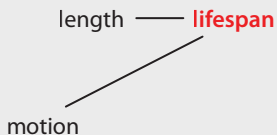

## mir-71::GFP (n=146)

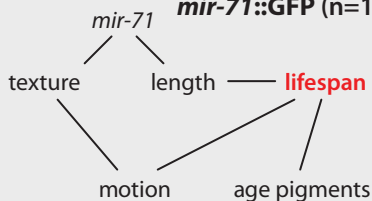

## Texture (n=433)

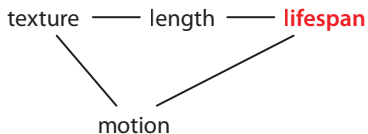

## mir-246::GFP (n=122)

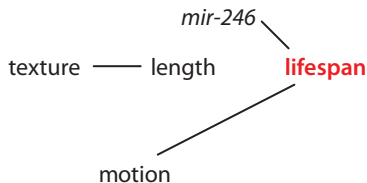

## Autofluorescence (n=213)

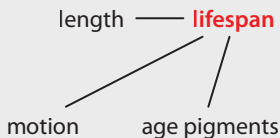

## mir-239::GFP (n=165)

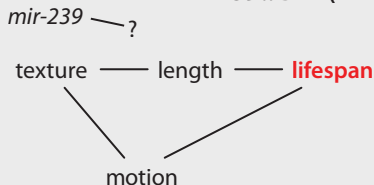

## Texture and autofluorescence (n=183)

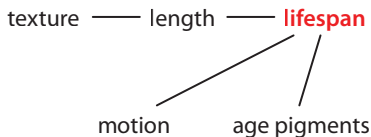

## Consensus

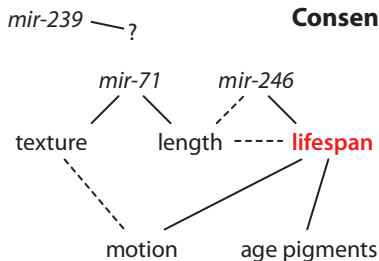

Supplement: pgen.1002306.s006.pdf [file pgen.1002306.s006.pdf]
