# Supplementary material for: MicroRNA Predictors of Longevity in Caenorhabditis elegans
Source: PubMed Central journal article supplement (PMC3183074; doi:10.1371/journal.pgen.1002306), 2011-09-29
Supplement: pgen.1002306.s007.pdf [file pgen.1002306.s007.pdf]

| Date       | Animals | Transgene           | Texture? | Age | Pigments? |
|------------|---------|---------------------|----------|-----|-----------|
| 2010-04-15 | 16      | <i>mir-71::GFP</i>  | Yes      |     | Yes       |
| 2010-04-27 | 21      | <i>mir-71::GFP</i>  | Yes      |     | Yes       |
| 2010-06-16 | 46      | <i>mir-71::GFP</i>  | Yes      |     | Yes       |
| 2010-06-18 | 37      | <i>mir-246::GFP</i> | Yes      |     | Yes       |
| 2010-06-28 | 26      | <i>mir-239::GFP</i> | Yes      |     | No        |
| 2010-07-28 | 63      | <i>mir-71::GFP</i>  | Yes      |     | Yes       |
| 2010-07-29 | 30      | <i>mls10</i>        | No       |     | Yes       |
| 2010-08-19 | 14      | <i>mir-246::GFP</i> | Yes      |     | No        |
| 2010-08-20 | 12      | <i>mir-239::GFP</i> | Yes      |     | No        |
| 2010-09-07 | 47      | <i>mir-239::GFP</i> | Yes      |     | No        |
| 2010-09-08 | 39      | <i>mir-246::GFP</i> | Yes      |     | No        |
| 2010-10-09 | 40      | <i>mir-239::GFP</i> | Yes      |     | No        |
| 2010-10-10 | 32      | <i>mir-246::GFP</i> | Yes      |     | No        |
| 2010-11-12 | 40      | <i>mir-239::GFP</i> | Yes      |     | No        |

Texture was not calculated for *mls10* animals: for these, extremely bright head GFP was captured in the brightfield images (which were acquired with the fluorescent shutter open for technical reasons). Other transgenes did not express GFP at levels high enough to alter the brightfield textural appearance.
