# Supplementary material for: MicroRNA Predictors of Longevity in Caenorhabditis elegans
Source: PubMed Central journal article supplement (PMC3183074; doi:10.1371/journal.pgen.1002306), 2011-09-29
Supplement: pgen.1002306.s008.pdf [file pgen.1002306.s008.pdf]

**Controlling for the below feature reduces the R<sup>2</sup> vs. lifespan to the given percentage of the overall R<sup>2</sup> (*p* and *n* values reported are for the controlled correlation)**

|                               | <b>Overall R<sup>2</sup> vs. lifespan</b> | Length                                  | Motion                                  | Texture                                 | Age pigments                             | <i>mir-71::GFP</i> PCA                  | <i>mir-246::GFP</i>                      | <i>mir-239::GFP</i>                      |
|-------------------------------|-------------------------------------------|-----------------------------------------|-----------------------------------------|-----------------------------------------|------------------------------------------|-----------------------------------------|------------------------------------------|------------------------------------------|
| <b>Length</b>                 | 0.321 ( <i>p</i> <0.0001 <i>n</i> =463)   |                                         | 73.5% ( <i>p</i> <0.0001 <i>n</i> =463) | 35.1% ( <i>p</i> <0.0001 <i>n</i> =433) | 99.4% ( <i>p</i> <0.0001 <i>n</i> =213)  | 59.1% ( <i>p</i> <0.0001 <i>n</i> =146) | 15.9% ( <i>p</i> =0.0124 <i>n</i> =122)  | 120.0% ( <i>p</i> <0.0001 <i>n</i> =165) |
| <b>Motion</b>                 | 0.201 ( <i>p</i> <0.0001 <i>n</i> =463)   | 50.4% ( <i>p</i> <0.0001 <i>n</i> =463) |                                         | 48.0% ( <i>p</i> <0.0001 <i>n</i> =433) | 62.7% ( <i>p</i> <0.0001 <i>n</i> =213)  | 24.9% ( <i>p</i> =0.0066 <i>n</i> =146) | 95.0% ( <i>p</i> <0.0001 <i>n</i> =122)  | 54.1% ( <i>p</i> <0.0001 <i>n</i> =165)  |
| <b>Texture</b>                | 0.264 ( <i>p</i> <0.0001 <i>n</i> =433)   | 18.9% ( <i>p</i> <0.0001 <i>n</i> =433) | 54.8% ( <i>p</i> <0.0001 <i>n</i> =433) |                                         | 101.4% ( <i>p</i> <0.0001 <i>n</i> =183) | 10.7% ( <i>p</i> =0.0427 <i>n</i> =146) | 22.4% ( <i>p</i> =0.0070 <i>n</i> =122)  | 97.1% ( <i>p</i> <0.0001 <i>n</i> =165)  |
| <b>Age pigments</b>           | 0.311 ( <i>p</i> <0.0001 <i>n</i> =213)   | 59.7% ( <i>p</i> <0.0001 <i>n</i> =213) | 73.8% ( <i>p</i> <0.0001 <i>n</i> =213) | 66.9% ( <i>p</i> <0.0001 <i>n</i> =183) |                                          | 35.7% ( <i>p</i> <0.0001 <i>n</i> =146) | 165.1% ( <i>p</i> <0.0001 <i>n</i> =37)* |                                          |
| <b><i>mir-71::GFP</i> PCA</b> | 0.475 ( <i>p</i> <0.0001 <i>n</i> =146)   | 4.8% ( <i>p</i> =0.0684 <i>n</i> =146)  | 67.2% ( <i>p</i> <0.0001 <i>n</i> =146) | 30.0% ( <i>p</i> <0.0001 <i>n</i> =146) | 70.9% ( <i>p</i> <0.0001 <i>n</i> =146)  |                                         |                                          |                                          |
| <b><i>mir-246::GFP</i></b>    | 0.203 ( <i>p</i> <0.0001 <i>n</i> =122)   | 65.5% ( <i>p</i> <0.0001 <i>n</i> =122) | 63.7% ( <i>p</i> <0.0001 <i>n</i> =122) | 97.4% ( <i>p</i> <0.0001 <i>n</i> =122) | 235.5% ( <i>p</i> <0.0001 <i>n</i> =37)* |                                         |                                          |                                          |
| <b><i>mir-239::GFP</i></b>    | 0.098 ( <i>p</i> <0.0001 <i>n</i> =165)   | 12.1% ( <i>p</i> =0.1643 <i>n</i> =165) | 54.0% ( <i>p</i> =0.0030 <i>n</i> =165) | 32.1% ( <i>p</i> =0.0230 <i>n</i> =165) |                                          |                                         |                                          |                                          |

All correlations include days 3–7 mean and slope values, except for *mir-246* and *mir-239*, which only use the slope measure.

\* If *a* and *b* independently determine *c*, controlling for *b* will increase the explanatory power of *a* vs. *c*, and vice-versa. (Other more complex scenarios are also possible.) This may therefore explain the >100% values observed, which is consistent with the networks illustrated in Figs. 6b and S6. The dataset with *mir-246::GFP* and age pigment values was too small to reliably calculate an overall partial-correlation network, so age pigment slope is not directly placed in the *mir-246::GFP* network in Fig. S6; however the >100% controlled-correlation values suggest that *mir-246* influences longevity completely independently from autofluorescence accumulation.
